# Supplementary material for: A seven-gene cluster in Ruminiclostridium cellulolyticum is essential for signalization, uptake and catabolism of the degradation products of cellulose hydrolysis
Source: PubMed Central journal article supplement (PMC5663094; doi:10.1186/s13068-017-0933-7), 2017-10-30
Supplement: 13068_2017_933_MOESM2_ESM.pdf [file 13068_2017_933_MOESM2_ESM.pdf]

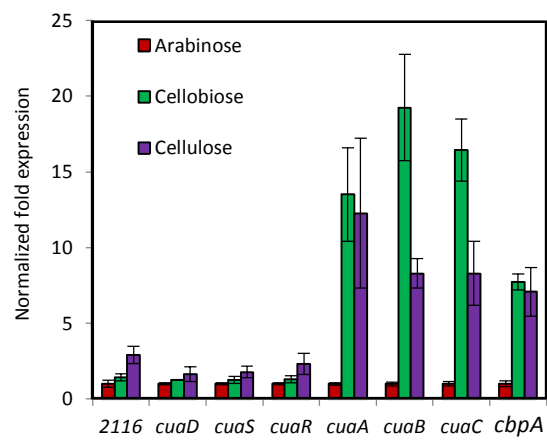

**Additional file 2. qPCR analysis of mRNA produced by WT strain**

Total RNA was extracted from cultures of *R. cellulolyticum* grown in minimal medium supplemented with 0.2% arabinose, cellobiose or 0.5% cellulose as the sole carbon source. Normalization was performed using the RNA16 gene. Error bars indicate the standard deviation of three independent experiments.
