# Supplementary material for: A seven-gene cluster in Ruminiclostridium cellulolyticum is essential for signalization, uptake and catabolism of the degradation products of cellulose hydrolysis
Source: PubMed Central journal article supplement (PMC5663094; doi:10.1186/s13068-017-0933-7), 2017-10-30
Supplement: 13068_2017_933_MOESM3_ESM.pdf [file 13068_2017_933_MOESM3_ESM.pdf]

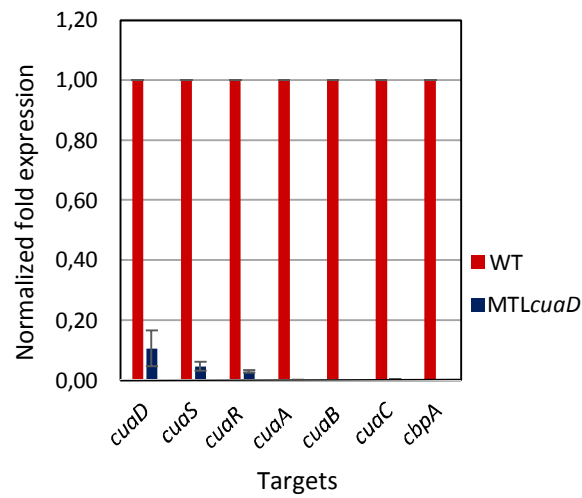

**Additional file 3. Comparison of *cua* genes expression level between WT and MTLcuaD mutant strain grown on arabinose.** qPCR was performed on cDNA prepared on total RNA extracted from cultures of *R. cellulolyticum* WT and MTLcuaD strains grown on minimal medium containing 2 g.L<sup>-1</sup> arabinose. Expression of the gene of the mutant strain MTLcuaD is presented compared to the WT gene expression normalized to 1.
