# Supplementary material for: A seven-gene cluster in Ruminiclostridium cellulolyticum is essential for signalization, uptake and catabolism of the degradation products of cellulose hydrolysis
Source: PubMed Central journal article supplement (PMC5663094; doi:10.1186/s13068-017-0933-7), 2017-10-30
Supplement: 13068_2017_933_MOESM4_ESM.pdf [file 13068_2017_933_MOESM4_ESM.pdf]

| Single-nucleotide polymorphism in the sequence of both adapted strains compared to the original mutant <i>MTLcuaD</i> strain |                |               |                   |                       |                  |                            |                                                      |
|------------------------------------------------------------------------------------------------------------------------------|----------------|---------------|-------------------|-----------------------|------------------|----------------------------|------------------------------------------------------|
| Position                                                                                                                     | Reference base | Observed base | Amino acid change | Effect                | Functional class | Localization               | Predicted gene product                               |
| 455589                                                                                                                       | A              | T             | NA                | Upstream              | None             | Bw Ccel_R0007 / Ccel_R0008 | rRNA-16S / tRNA-Ala                                  |
| 2127097                                                                                                                      | G              | T             | NA                | Upstream              | None             | Bw Ccel_1774 / Ccel_R0045  | ATP dependant helicase-nuclease subunit A / tRNA-Gln |
| 2127098                                                                                                                      | C              | T             | *1249             | Synonymous_stop       | Silent           | Ccel_1774                  | ATP dependant helicase-nuclease subunit A            |
| 2606472                                                                                                                      | C              | G             | D380H             | Non_synonymous_Coding | Missense         | Ccel_2228                  | Hypothetical protein                                 |
| 2914046                                                                                                                      | A              | C             | NA                | Upstream              | None             | Bw Ccel_R0059 / Ccel_R0058 | rRNA-16S / rRNA-23S                                  |
| 4055304                                                                                                                      | A              | G             | NA                | Upstream              | None             | Bw Ccel_R0088 / Ccel_R0087 | rRNA-16S / rRNA-23S                                  |
| 2316753                                                                                                                      | C              | T             | G263S             | NON_SYNONYMOUS_CODING | MISSENSE         | Ccel_1956                  | cell wall associated hydrolase                       |

| Insertions/deletions in the sequence of both adapted strains compared to the original mutant <i>MTLcuaD</i> strain |                |               |          |                  |                            |                     |
|--------------------------------------------------------------------------------------------------------------------|----------------|---------------|----------|------------------|----------------------------|---------------------|
| Position                                                                                                           | Reference base | Observed base | Effect   | Functional class | Localization               | Gene product        |
| 455591                                                                                                             | A              | Act           | Upstream | None             | Bw Ccel_R0007 / Ccel_R0008 | rRNA-16S / tRNA-Ala |
| 455593                                                                                                             | Tgg            | T             | Upstream | None             | Bw Ccel_R0007 / Ccel_R0008 | rRNA-16S / tRNA-Ala |
| 2471924                                                                                                            | Gga            | G             | Upstream | None             | Bw Ccel_2112 / Ccel_2111   | CuaA / CuaB         |

**Additional file 4. Mutations found in the sequence of the adapted *MTLcuaD* mutant strain.**

The table reports all single-nucleotide polymorphism (SNP) and insertions/deletions mutations (In/Del) type which were common to two individual *MTLcuaD* mutant strains clones and absent from the *MTLcuaD* mutant strain.(white background), and the mutations that were found only in the mutant strain (grey background). (NA: not applicable ; \*: stop codon; Bw: between)
