# Supplementary material for: A seven-gene cluster in Ruminiclostridium cellulolyticum is essential for signalization, uptake and catabolism of the degradation products of cellulose hydrolysis
Source: PubMed Central journal article supplement (PMC5663094; doi:10.1186/s13068-017-0933-7), 2017-10-30
Supplement: 13068_2017_933_MOESM5_ESM.pdf [file 13068_2017_933_MOESM5_ESM.pdf]

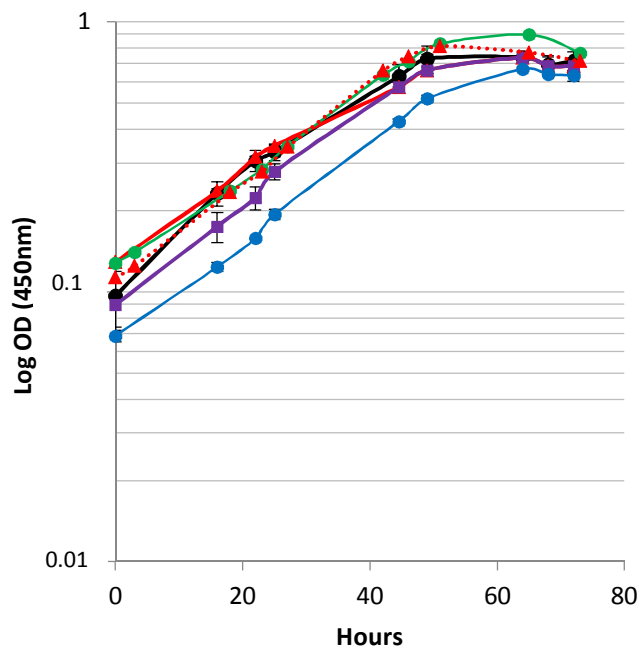

#### **Additional file 5 : Growth of the MTLcuaD complemented strain on arabinose**

The strains were grown on minimal medium containing 2 g.L<sup>-1</sup> arabinose. WT strain (black), MTLcuaD strain (red); MTLcuaD strain carrying an empty vector (red dotted line); MTLcuaD strain carrying pSOScbpA (blue); MTLcuaD strain carrying pSOSABC (purple); MTLcuaD strain carrying pSOSABC-cbpA (green). Experiments were performed in triplicate and bars indicate the standard deviation.
