# Supplementary material for: A seven-gene cluster in Ruminiclostridium cellulolyticum is essential for signalization, uptake and catabolism of the degradation products of cellulose hydrolysis
Source: PubMed Central journal article supplement (PMC5663094; doi:10.1186/s13068-017-0933-7), 2017-10-30
Supplement: 13068_2017_933_MOESM7_ESM.pdf [file 13068_2017_933_MOESM7_ESM.pdf]

## Additional file 7. Bacterial strains and vectors used

| Strain or plasmid                                | Relevant characteristics                                                                                                                                                                                                                | Source or reference  |
|--------------------------------------------------|-----------------------------------------------------------------------------------------------------------------------------------------------------------------------------------------------------------------------------------------|----------------------|
| <i>E. coli</i> DH5a                              | F <sup>-</sup> <i>endA1 hsdR17</i> (rK <sup>-</sup> mK <sup>+</sup> ) <i>supE44 thi-1 λ<sup>-</sup> gyrA96 relA1Δ(lacZYA argF) U169</i> (Φ80 <i>lacZΔM15</i> ) <i>recA</i>                                                              | Roche Diagnostics    |
| <i>E. coli</i> SG13009(pREP4)                    | F <sup>-</sup> <i>his pyrD Alon-100 rpsL</i> (pREP4)                                                                                                                                                                                    | Qiagen               |
| <i>E. coli</i> BL21(DE3)                         | F <sup>-</sup> <i>ompT hsdS</i> (rB <sup>-</sup> mB <sup>-</sup> ) <i>gal dcm</i> (DE3)                                                                                                                                                 | Novagen              |
| <i>C. cellulolyticum</i> H10                     | Wild-type, ATCC35519 DSM 5812                                                                                                                                                                                                           | DSMZ                 |
| <i>C. cellulolyticum</i> MTL <i>cuaD</i>         | ATCC35319, <i>cuaD</i> ::intron, Erm <sup>r</sup>                                                                                                                                                                                       | This study           |
| <i>C. cellulolyticum</i> MTL <i>cuaD</i> adapted | ATCC35319 derivative, <i>cuaD</i> ::intron, Erm <sup>r</sup> , able to grow on cellobiose/cellulose                                                                                                                                     | This study           |
| pET22b(+) and pET28a(+)                          | <i>E. coli</i> expression vector, Amp <sup>r</sup> and Kan <sup>r</sup> respectively                                                                                                                                                    | Novagen              |
| pET <i>cuaD</i>                                  | pET22b+ derivative carrying the NdeI-XhoI fragment encoding mature CuaD                                                                                                                                                                 | This study           |
| pET <i>cuaA</i>                                  | pET22b+ derivative carrying the NdeI-XhoI fragment encoding mature CuaA                                                                                                                                                                 | This study           |
| pET <i>cbpA</i>                                  | pET28a+ derivative carrying the NdeI-XhoI fragment encoding CbpA                                                                                                                                                                        | This study           |
| pBAD24                                           | <i>E. coli</i> expression vector, Kan <sup>r</sup>                                                                                                                                                                                      | (46) gift M. Ansaldi |
| pBAD <i>cuaR</i>                                 | pBAD24 derivative carrying the EcoRI-PstI fragment encoding CuaR                                                                                                                                                                        | This study           |
| pUA66                                            | <i>E. coli</i> (pSC101), Kan <sup>R</sup> , <i>gfpmut2</i>                                                                                                                                                                              | (47) gift M Ansaldi  |
| pUA66-IG1                                        | pUA66 derivative carrying the 580 bp XhoI-BamHI intergenic region upstream of the gene at the locus Ccel_2108                                                                                                                           | This study           |
| pUA66-IG2                                        | pUA66 derivative carrying the 423 bp XhoI-BamHI intergenic region upstream of <i>cuaD</i>                                                                                                                                               | This study           |
| pUA66-IG3                                        | pUA66 derivative carrying the 535 bp XhoI-BamHI intergenic region upstream of <i>cuaA</i>                                                                                                                                               | This study           |
| pUA66-IG4                                        | pUA66 derivative carrying the 924 bp XhoI-BamHI intergenic region upstream of <i>cbpA</i>                                                                                                                                               | This study           |
| pMTL007                                          | <i>E. coli/Clostridium</i> shuttle vector (ColE1, pCB102)LL. <i>ltr</i> Bintron ( <i>ermBtdRAM2</i> ) under the control of <i>P<sub>fac</sub></i> , <i>ltrA</i> ; Cm <sup>r</sup> /Tm <sup>r</sup>                                      | (23)                 |
| pMTL007 <i>cuaD</i>                              | pMTL007 derivative targeting <i>cuaD</i> (locus Ccel_2115)                                                                                                                                                                              | This study           |
| pSOSzero-Tm                                      | <i>E. coli/Clostridium</i> shuttle vector (ColE1, pIM13); Ap <sup>r</sup> , Cm <sup>r</sup> /Tm <sup>r</sup>                                                                                                                            | (45)                 |
| pSOS954                                          | <i>E. coli/Clostridium</i> shuttle vector (ColE1, pIM13); Ap <sup>r</sup> ,Em <sup>R</sup> , containing an expression cassette controlled by the <i>thiolase</i> gene promotor ( <i>P<sub>thi</sub></i> ) from <i>C. acetobutylicum</i> | (24)                 |
| pSOS956                                          | pSOSzero-Tm derivative carrying the SalI-SalI expression cassette from <i>C. acetobutylicum</i> from pSOS954, Ap <sup>r</sup> , Cm <sup>r</sup> /Tm <sup>r</sup>                                                                        | This study           |
| pSOS <i>cuaABC</i>                               | pSOS956 carrying the BamHI-NarI fragment encoding full length <i>cuaA</i> , <i>cuaB</i> , <i>cuaC</i> genes, Ap <sup>r</sup> , Cm <sup>r</sup> /Tm <sup>r</sup>                                                                         | This study           |
| pSOS <i>cuaABC-cbpA</i>                          | pSOS956 carrying the BamHI-NarI fragment encoding full length <i>cuaA</i> , <i>cuaB</i> , <i>cuaC</i> , <i>cbpA</i> genes, Ap <sup>r</sup> , Cm <sup>r</sup> /Tm <sup>r</sup>                                                           | This study           |
| pSOS <i>cbpA</i>                                 | pSOS956 carrying the BamHI-NarI fragment encoding full length <i>cbpA</i> , Ap <sup>r</sup> , Cm <sup>r</sup> /Tm <sup>r</sup>                                                                                                          | This study           |

Ap<sup>r</sup>, ampicilline resistance ; Erm<sup>r</sup>, erythromycin resistance ; Kan<sup>r</sup>, kanamycine resistance ; Cm<sup>r</sup>/Tm<sup>r</sup>, chloramphenicol/thiamphenicol resistance
