# Supplementary material for: A seven-gene cluster in Ruminiclostridium cellulolyticum is essential for signalization, uptake and catabolism of the degradation products of cellulose hydrolysis
Source: PubMed Central journal article supplement (PMC5663094; doi:10.1186/s13068-017-0933-7), 2017-10-30
Supplement: 13068_2017_933_MOESM8_ESM.pdf [file 13068_2017_933_MOESM8_ESM.pdf]

## Additional file\_8: Primer used

| EXPERIMENT                          | NAME             | SEQUENCE                                                     | FEATURES                              |
|-------------------------------------|------------------|--------------------------------------------------------------|---------------------------------------|
| <b>Targeted mutagenesis</b>         | IBS $cuaD$ _887  | AAAAAAGCTTATAATTATCCTTAGGTATCATCTCAGTGCGCCCAGATAGGGTG        |                                       |
|                                     | EBS1 $dcaD$ _887 | CAGATTGTACAAATGTGGTGATAACAGATAAGTCATCTCAACTAACTTACCTTTCTTTGT |                                       |
|                                     | EBS2 $cuaD$ _887 | TGAACGCAAGTTTCTAATTTTCGATTATACCTCGATAGAGGAAAGTGTCT           |                                       |
|                                     | EBS universal    | CGAAATTAGAACTTGCCTTCAGTAAAC                                  |                                       |
|                                     | IBS $cuaA$ _89   | AAAAAAGCTTATAATTATCCTTAGATGCCGAAGCAGTGCGCCCAGATAGGGTG        |                                       |
|                                     | EBS1 $dcaA$ _89  | CAGATTGTACAAATGTGGTGATAACAGATAAGTCGAAGCAGTTAACTTACCTTTCTTTGT |                                       |
|                                     | EBS2 $cuaA$ _89  | TGAACGCAAGTTTCTAATTTTCGATTGCATCTCGATAGAGGAAAGTGTCT           |                                       |
|                                     | IBS $cuaA$ _786  | AAAAAAGCTTATAATTATCCTTAGCCAGCCTTCCAGTGCGCCCAGATAGGGTG        |                                       |
|                                     | EBS1 $dcaA$ _786 | CAGATTGTACAAATGTGGTGATAACAGATAAGTCCTTCCACATAACTTACCTTTCTTTGT |                                       |
|                                     | EBS2 $cuaA$ _786 | TGAACGCAAGTTTCTAATTTTCGATTCTGGCTCGATAGAGGAAAGTGTCT           |                                       |
| <b>Control of the mutation</b>      | CuaD_734Dir      | ATATGAAGGAACCTTCAACAAGATGC                                   |                                       |
|                                     | CuaD_1187Rev     | ACATGATCAGGGATTGCACAC                                        |                                       |
| <b>Production in <i>E. coli</i></b> | CuaDNdeID        | AATT <u>CATATG</u> CACCACCACCACCACCACTGCAGCAGTGACAATTCG      | NdeI is underlined, ATG boldface type |
|                                     | CuaDXhoIR        | AATT <u>CTCGAGT</u> TACTGCAATTTGTCTAATGCTTTTTCC              | XhoI is underlined                    |
|                                     | CuaANdeID        | AATT <u>CATATG</u> CACCACCACCACCACCACTGTGGAAACACAGAGTCAGG    | NdeI is underlined, ATG boldface type |
|                                     | CuaAXhoIR,       | AATT <u>CTCGAGT</u> TACTTCAATTCAGGAACATTTTTCTTC              | XhoI is underlined                    |
|                                     | 2109Ncof         | TTTTTT <u>CCATGGT</u> GAAATACGGTTTCTTTGATGATA                | NcoI is underlined, ATG boldface type |
|                                     | 2109Xhor         | TTTTTT <u>CTCGAGT</u> CCCATTTACTTTCGACCTGATG                 | XhoI is underlined                    |
| <b>Fluorescence studies</b>         | pBadRegFLEcoD    | TTAC <u>GAAATC</u> ACCATGTACAAGGTTCTAATAATTGATG              | EcoRI is underlined                   |
|                                     | pBadRegPstR      | ATAT <u>CTGCAGT</u> TAATAACAACACTATCTCTGTATTCCG              | PstI is underlined                    |
|                                     | IG1gfpXhoID      | AAGC <u>CTCGAGC</u> ACCTGTAAGTACAACCTCATGTTATATC             | XhoI is underlined                    |
|                                     | IG1gfpBamR       | AATAGGATCCTTACGCATAAGCCCTCCTG                                | BamHI is underlined                   |
|                                     | IG2gfpXhoD       | AAGG <u>CTCGAGG</u> GACCGCTGTCAGAAG                          | XhoI is underlined                    |
|                                     | IG2gfpBamR       | AATAGGATCC CACTGCTGCAAGAACTG                                 | BamHI is underlined                   |
|                                     | IG3gfpXhoD       | AAGG <u>CTCGAGA</u> AAGGCAAAAGAACTTCTAAAGG                   | XhoI is underlined                    |
|                                     | IG3gfpBamR       | AATAGGATCCATTTCCAGTACCATAACGCC                               | BamHI is underlined                   |
|                                     | IG4gfpXhoD       | AAGG <u>CTCGAGAG</u> CAAAACACTATGGTGCCAG                     | XhoI is underlined                    |
|                                     | IG4gfpBamR       | AATCGGATCCAGGATAAGGTGTTTTAGGTGTTG                            | BamHI is underlined                   |

| EXPERIMENT                     | NAME                  | SEQUENCE                                                    | FEATURES            |
|--------------------------------|-----------------------|-------------------------------------------------------------|---------------------|
| <b>Complementation studies</b> | 2112BamDir            | ATTAAGGATCCAGAATTTAAAAGGAGGGATTAAAATGTTTAAAAAGGTAATAGCTTCTG | BamHI is underlined |
|                                | 2110NarRev            | CCTTGGCGCCTTAGCCTTTTACAGACCCTGC                             | NarI is underlined  |
|                                | 2109NarRev            | AATTGGCGCCTTATCCATTATTACTTCGACCTG                           | NarI is underlined  |
|                                | 2109NarDir            | TTAAGGCGCCAGAATTTAAAAGGAGGGATTAAATTGAAATACGGTTTCTTTGATGATAC | NarI is underlined  |
|                                | 2109BamDir            | TTAAGGATCCAGAATTTAAAAGGAGGGATTAAATTGAAATACGGTTTCTTTGATGATAC | BamHI is underlined |
| <b>Transcriptional links</b>   | 2107-E-RT-up          | GGTACCGGACTCGGATTGT                                         |                     |
|                                | 2108-E-RT-up          | GAAGGGCATCTAATGCCAGA                                        |                     |
|                                | 2108-S-RT-do          | TCTGGCATTAGATGCCCTTC                                        |                     |
|                                | 2109-E-RT-up          | TTATTAGCAATCCCGAACACG                                       |                     |
|                                | 2109-S-RT-do          | TCTACGTAAACGTGCGTCCTT                                       |                     |
|                                | 2110-E-RT-up          | GCCAGAATAGCAGCATTGGT                                        |                     |
|                                | 2110-S-RT-do          | TGCTGTTGAGAGGACAGCAA                                        |                     |
|                                | 2111-E-RT-up          | TGTATGAGGCTGCACGTGTT                                        |                     |
|                                | 2111-S-RT-do          | CGTCCATTCATTAAGGCTCA                                        |                     |
|                                | 2112-E-RT-up          | GTGGGGATACATTGCTGACC                                        |                     |
|                                | 2112-S-RT-do          | TGAGCTTGATGCAGAAGCAG                                        |                     |
|                                | 2113-E-RT-up          | CGAAGTTGCAGAGAAGGTTG                                        |                     |
|                                | 2113-S-RT-do          | ACCATCCATTCCAGGCATAC                                        |                     |
|                                | 2114-E-RT-up          | CCGTTAATCGAAAATGCTGTC                                       |                     |
|                                | 2114-S-RT-do          | TCGTTTGAGTACGAAAGGGATT                                      |                     |
|                                | 2115-E-RT-up          | GGGGTACACCCAATAGCAAA                                        |                     |
| 2115-S-RT-do                   | TTTGCTGTTACGAGCATTTGA |                                                             |                     |
| 2116-E-RT-up                   | TCAGGAAGCCAGTGAAAAGG  |                                                             |                     |
| <b>qPCR</b>                    | Rpodir                | AAACATAGTCAAGAAAGTAGAAAAG                                   |                     |
|                                | Rporev                | CTATACTAACAACCAGCCTTAAG                                     |                     |
|                                | 2109F                 | ATGAGTGCAGGCATGGTTTG                                        |                     |
|                                | 2109R                 | ACCGAGTTCTCAACTTCAACC                                       |                     |
|                                | 2110F                 | CACAGTTCAAGGCGTTCCAA                                        |                     |
|                                | 2110R                 | GCTCTGTACAACGCATCCAG                                        |                     |
|                                | 2111F                 | TAGCTGCAGGTTTGTGTGG                                         |                     |
|                                | 2111R                 | CAACACGTGCAGCCTCATAC                                        |                     |

| <b>EXPERIMENT</b> | <b>NAME</b> | <b>SEQUENCE</b>         | <b>FEATURES</b> |
|-------------------|-------------|-------------------------|-----------------|
| <b>qPCR</b>       | 2112F       | AGGAACCCTCTTTGACATGGA   |                 |
|                   | 2112R       | CATTCTGGAAGGCAGCGATT    |                 |
|                   | 2113F       | GCGGGGCATATGATTTCCTC    |                 |
|                   | 2113R       | AGTCGTTTTCCATTACAACCAGA |                 |
|                   | 2114F       | CGGAACTCAGGTCAGTGGTA    |                 |
|                   | 2114R       | CCTCGGATTCCAGTCCCTTT    |                 |
|                   | 2115F       | TCCGTCCATGGGAAATGGAA    |                 |
|                   | 2115R       | GCTGAATAGGCCGGATTCTT    |                 |
|                   | 2116F       | ATCAACCAGTCGGTCAGGA     |                 |
|                   | 2116R       | ACCTACACCCGGTTCTCCTA    |                 |
